1 **FRONT MATTER**

2

3 **Title**

4 Cells recognize osmotic stress through liquid-liquid phase separation lubricated with  
5 poly(ADP-ribose)

6

7 **Authors**

8 Kengo Watanabe<sup>1,\*</sup>, Kazuhiro Morishita<sup>1</sup>, Xiangyu Zhou<sup>1</sup>, Shigeru Shiizaki<sup>1</sup>, Yasuo  
9 Uchiyama<sup>2</sup>, Masato Koike<sup>3</sup>, Isao Naguro<sup>1</sup>, Hidenori Ichijo<sup>1,\*</sup>.

10

11 **Affiliations**

12 <sup>1</sup>Laboratory of Cell Signaling, Graduate School of Pharmaceutical Sciences, The  
13 University of Tokyo, Tokyo 113-0033, Japan.

14 <sup>2</sup>Department of Cellular and Molecular Neuropathology, Juntendo University Graduate  
15 School of Medicine, Tokyo 113-8421, Japan.

16 <sup>3</sup>Department of Cell Biology and Neuroscience, Juntendo University Graduate School of  
17 Medicine, Tokyo 113-8421, Japan.

18 \*Correspondence to: kwatanabe@mol.f.u-tokyo.ac.jp (K.W.), ichijo@mol.f.u-tokyo.ac.jp  
19 (H.I.)

20

21 **Abstract**

22 Cells are under threat of osmotic perturbation; and cell volume maintenance is critical in  
23 cerebral edema, inflammation and aging, in which prominent changes in intracellular or  
24 extracellular osmolality emerge. After osmotic stress-enforced cell swelling or shrinkage,  
25 the cells regulate intracellular osmolality to recover their volume. However, the  
26 mechanisms recognizing osmotic stress remain obscured. We previously clarified that  
27 apoptosis signal-regulating kinase 3 (ASK3) bidirectionally responds to osmotic stress  
28 and regulates cell volume recovery. Here, we report that macromolecular crowding  
29 induces liquid-demixing condensates of ASK3 under hyperosmotic stress, which  
30 transduce osmosensing signal into ASK3 inactivation. A genome-wide small interfering  
31 RNA (siRNA) screen identified an ASK3 inactivation regulator, nicotinamide  
32 phosphoribosyltransferase (NAMPT), related to poly(ADP-ribose) signaling.  
33 Furthermore, we clarify that poly(ADP-ribose) keeps ASK3 condensates in the liquid  
34 phase and enables ASK3 to become inactivated under hyperosmotic stress. Our findings  
35 demonstrate that cells rationally incorporate physicochemical phase separation into their  
36 osmosensing systems.

37

38

## 39 MAIN TEXT

40

### 41 Introduction

42 When a difference between intracellular and extracellular osmolality develops, cells  
43 inevitably become swollen or shrunken following osmotically driven water flow. The  
44 abnormal cellular osmoregulation leads to deteriorated pathophysiological conditions  
45 observed in cerebral edema, inflammation, cataracts and aging (1–7). Basically,  
46 homeostasis in cell volume is vital for cellular activities and cells have a defense system  
47 against the disastrous osmotic stress; cells immediately excrete or intake ions and small  
48 organic solutes after hypoosmotic or hyperosmotic stresses, respectively, and recover  
49 their volume within minutes to hours by controlling ion channels and transporters (8–10).  
50 Many electrophysiological and pharmacological studies have contributed to the  
51 accumulation of knowledge about the effector molecules in cell volume regulation. In  
52 contrast, the mechanisms sensing osmotic stress to induce cell volume recovery remain  
53 unclear, especially in mammalian cells. Similar to the osmosensors proposed in bacteria,  
54 yeasts and plants (11–13), mechanical changes in/on the cell membrane have recently  
55 drawn attention in mammalian cells; for example, membrane stretching under  
56 hypoosmotic stress activates mechanosensitive channels such as the transient receptor  
57 potential (TRP) channel V4 (14, 15). This mechanism can be illustrated by an easy-to-  
58 understand signaling schematic with arrows directed from the extracellular side to the  
59 intracellular side. However, osmotic stress perturbs not only the cell membrane but also  
60 the intracellular ion strength/concentration and macromolecular crowding (8, 9);  
61 therefore, the existence of intracellular osmosensors may currently be underestimated.

62 We previously reported that apoptosis signal-regulating kinase 3 (ASK3; also known  
63 as MAP3K15) is phosphorylated and activated under hypoosmotic stress and conversely  
64 dephosphorylated and inactivated under hyperosmotic stress (16). Furthermore, in  
65 addition to the rapid, sensitive and reversible nature, this bidirectional response of ASK3  
66 orchestrates proper cell volume recovery under both hypoosmotic and hyperosmotic  
67 stresses (17). Therefore, we conceived that the elucidation of ASK3 regulation under  
68 osmotic stress would lead to the clarification of a general mammalian osmosensing  
69 system. In this study, we report that ASK3 forms liquid droplets under hyperosmotic  
70 stress, which is necessary for ASK3 inactivation. Moreover, by utilizing a genome-wide  
71 small interfering RNA (siRNA) screen, we reveal that poly(ADP-ribose) (PAR)  
72 maintains the liquidity of ASK3 droplets for ASK3 inactivation. Our findings reveal that  
73 cells recognize osmotic stress by utilizing liquid-liquid phase separation (LLPS) of ASK3  
74 with the support of PAR.

75

## 76 Results

### 77 **Hyperosmotic stress induces ASK3 condensation through liquid-liquid phase** 78 **separation**

79 Through analyses of ASK3, we found that the subcellular localization of ASK3  
80 drastically changes under hyperosmotic stress: a part of ASK3 diffuses throughout the  
81 cytosol, while the other forms granule-like structures, ASK3 condensates (Fig. 1A). The  
82 number of ASK3 condensates increased in a hyperosmolality strength-dependent manner

83 (Fig. 1B) and gradually diminished several dozen minutes after hyperosmotic stress (Fig.  
84 S1A and B), which corresponds to the time range of cell volume recovery (10, 17). In  
85 addition to mannitol-supplemented medium, sodium chloride-supplemented medium  
86 induced a similar pattern of ASK3 localization (Fig. S1C and D), suggesting that  
87 hyperosmolality causes ASK3 condensates. Counterintuitively, the size of condensates  
88 was inversely correlated with hyperosmolality (Fig. 1B). In fact, a simple computational  
89 model (18) predicted that the size of ASK3 clusters would increase as the grid space is  
90 reduced, mimicking cell shrinkage under hyperosmotic stress (Fig. S1E and F, see also  
91 Supplementary Text). However, there are abundant macromolecules in cells (19); and we  
92 modified the model by adding obstacles (Fig. S1G). Our simulation results demonstrated  
93 that decreasing the grid space progressively increases both the number and size of ASK3  
94 clusters, while further decreasing the grid space eventually reduces the size of clusters  
95 after the maximum has been reached (Fig. 1C, D and Movie S1), implying that the  
96 macromolecular crowding is critical for ASK3 condensates under hyperosmotic stress in  
97 cells.

98 Further characterization revealed that ASK3 condensates are colocalized with a  
99 marker of neither early endosomes nor lysosomes (Fig. S1H and I). Transmission  
100 electron microscopy (TEM) analysis with the immunogold-labelling technique revealed  
101 that ASK3 condensates are membrane-less structures (Fig. 1E). Although stress granules  
102 and P-bodies are known membrane-less structures under extreme hyperosmotic  
103 conditions (20, 21), markers of neither structure were found to be colocalized with ASK3  
104 condensates (Fig. S1J). Upon observing in 1-second intervals, we found that ASK3  
105 condensates appear just seconds after hyperosmotic stress, which is much faster than in  
106 the case of stress granules, and that ASK3 condensates dynamically move around and  
107 fuse with each other (Fig. 1F and Movie S2). Furthermore, our computational model  
108 predicted that the shrinkage-induced clusters gradually disappear when the grid space is  
109 reverted back to the initial state (Fig. 1G, H and Movie S3, and Supplementary Text), and  
110 we observed similar kinetics of reversibility in cells (Fig. 1I and J). Interestingly, our  
111 model also predicted a transient increase in the size of clusters just after restoration to the  
112 initial space, which was in good agreement with the cell-based experiments. To further  
113 address the dynamics of ASK3 condensates, we established a fluorescence recovery after  
114 photobleaching (FRAP) assay for the rapidly moving condensates and found that ASK3  
115 condensates display not complete but significant FRAP (Fig. 1K and L), indicating that  
116 ASK3 molecules in the condensates are interchanged with those in the cytosol.

117 Given these characteristics, we concluded that ASK3 condensates are liquid-demixing  
118 droplets induced by LLPS (22–24). Indeed, according to soft matter physics, there are  
119 two modes of LLPS, “nucleation and growth” and “spinodal decomposition”, and we  
120 observed the spinodal decomposition-like pattern of ASK3 as a rare case (Fig. S1K).  
121 Additionally, crowding reagents, such as Ficoll and polyethylene glycol (PEG), induced  
122 ASK3 condensates in vitro (Fig. 1M and N). Although the intracellular ion strength and  
123 concentration are altered under hyperosmotic stress in cells, the change in sodium  
124 chloride concentration did not induce ASK3 condensates in vitro, suggesting again that  
125 molecular crowding but not ion strength is a critical driving force for the formation of  
126 ASK3 condensates under hyperosmotic stress. Of note, the condensates produced by our  
127 in vitro assays are solid-like because we could not observe their FRAP, but the results can

128 be extrapolated to the case in the liquid phase because the driving force in the formation  
129 step would be common between the liquid-like and solid-like condensates (22–24).

### 130 **C-terminus coiled-coil and low complexity region are required for ASK3** 131 **condensation followed by ASK3 inactivation under hyperosmotic stress**

132 To clarify the significance of ASK3 condensation in cells, we first generated ASK3  
133 mutants that are unable to condense. While ASK3  $\Delta$ N normally condensed, ASK3  $\Delta$ C  
134 lost the ability to condense under hyperosmotic stress (Fig. 2A and B). Moreover, ASK3  
135 CT formed condensates even under isoosmotic conditions, while ASK3 NT and KD did  
136 not exhibit the ability to condense, suggesting that the C-terminus of ASK3 is necessary  
137 and sufficient for ASK3 condensation. In the ASK3 C-terminus, 5 distinctive regions are  
138 bioinformatically predicted (Fig. S2A): two intrinsically disordered regions (IDRs; Fig.  
139 S2B), one coiled-coil domain (CC), one sterile alpha motif domain (SAM) (25) and one  
140 low complexity region (LCR). Between ASK3 CT mutants with these deletions, CT $\Delta$ CC,  
141 CT $\Delta$ SAM and CT $\Delta$ LCR exhibited reduced condensation ability compared with the  
142 original CT (Fig. S2C). Considering the location of LCR within SAM, we next deleted  
143 both CC and SAM or LCR from ASK3 CT and found that CT $\Delta$ CC $\Delta$ SAM and  
144 CT $\Delta$ CC $\Delta$ LCR are unable to condense even under hyperosmotic stress (Fig. S2D),  
145 suggesting that both CC and LCR contribute to ASK3 condensation. In addition, we  
146 confirmed that full-length ASK3 lacking the C-terminus CC (CCC) and LCR (CLCR)  
147 cannot form condensates under hyperosmotic stress (Fig. 2C).

148 Previously, we elucidated that ASK3 is inactivated a few minutes after hyperosmotic  
149 stress by protein phosphatase 6 (PP6) (17). Since ASK3 condensation occurs prior to its  
150 inactivation, we evaluated the inactivation of ASK3 mutants lacking condensation ability.  
151 Although exhibiting lower basal activities under isoosmotic conditions, ASK3  $\Delta$ C and  
152  $\Delta$ CCC $\Delta$ CLCR were not inactivated under hyperosmotic stress (Fig. 2D and S3A),  
153 suggesting that ASK3 condensation is required for its inactivation. In fact, we discovered  
154 the unique relationship between ASK3 condensates and one of the PP6 subunits  
155 ANKRD52 (17, 26); ANKRD52 condensates are not completely colocalized with ASK3  
156 condensates, but they move around and grow while sharing their phase boundaries (Fig.  
157 2E and Movie S4).

### 158 **Nicotinamide phosphoribosyltransferase regulates ASK3 inactivation via the NAD** 159 **salvage pathway**

160 To reveal the details of ASK3 condensation and inactivation, we investigated the  
161 candidate regulators of ASK3 inactivation identified by our genome-wide siRNA screen  
162 (17). Among them, we focused on the highest-ranked and unexpected candidate  
163 nicotinamide phosphoribosyltransferase (NAMPT), the rate-limiting enzyme in the  
164 mammalian nicotinamide adenine dinucleotide (NAD) salvage pathway (27) (Fig. 3A and  
165 B). NAMPT knockdown suppressed ASK3 inactivation under hyperosmotic stress (Fig.  
166 3C and S3B). Additionally, NAMPT knockdown increased endogenous ASK3 activity  
167 and inhibited downstream STE20/SPS1-related proline/alanine-rich kinase  
168 (SPAK)/oxidative stress-responsive kinase 1 (OSR1) activities under hyperosmotic stress  
169 (Fig. 3D and S3C), consistent with our previous finding that ASK3 suppresses

170 SPAK/OSR1 in a kinase activity-dependent manner (16). Overexpression of wild-type  
171 (WT) NAMPT fully accelerated ASK3 inactivation under hyperosmotic stress in an  
172 amount-dependent manner (compare lanes 8–10: Fig. 3E and S3D). In accordance with  
173 the fact that NAMPT enzymatically functions as a homodimer (28), the homodimer-  
174 insufficient mutant S199D could not fully promote ASK3 inactivation, and the  
175 homodimer-null mutant S200D could not promote any ASK3 inactivation (29) (lanes 11–  
176 14: Fig. 3E and S3D). Furthermore, the NAMPT enzymatic inhibitor FK866 (30)  
177 inhibited ASK3 inactivation, which was canceled by further supplementation with the  
178 NAMPT product nicotinamide mononucleotide (NMN) (Fig. 3F and S3E). Moreover,  
179 pretreatment with FK866 and NMN suppressed and promoted the interaction between  
180 ASK3 and PP6 under hyperosmotic stress, respectively (17) (Fig. 3G, 3H, S3F and S3G).  
181 Hence, NAMPT ensures ASK3 inactivation by PP6 via the NAD salvage pathway.

### 182 **Poly(ADP-ribose) maintains the liquidity of ASK3 condensates for its inactivation**

183 NAD is not only a coenzyme in cellular redox reactions but also a substrate for enzymatic  
184 consumers, including cADP-ribose synthase CD38/157, sirtuins and PAR polymerases  
185 (PARPs) (31) (Fig. 3B). We thus examined the potential involvement of NAD-  
186 consuming enzymes in ASK3 inactivation. In contrast to the overexpression of NAMPT  
187 (Fig. 3E), neither CD38, SIRT2 nor PARP1 enhanced ASK3 inactivation under  
188 hyperosmotic stress (Fig. S4A–C); rather, their overexpression even suppressed ASK3  
189 inactivation, probably because they compete with the actual NAD-requiring regulators in  
190 ASK3 inactivation with respect to NAD. In the dynamics of PARylation, however, not  
191 only PARP writers but also readers and erasers regulate PAR signaling (32, 33) (Fig.  
192 4A). Interestingly, NAMPT overexpression and FK866 pretreatment increased and  
193 decreased PARsylated proteins, respectively (Fig. 4B and S3H). We therefore examined  
194 the potential involvement of PAR signaling in ASK3 inactivation by controlling an eraser  
195 PAR glycohydrolase (PARG). PARG overexpression partially suppressed ASK3  
196 inactivation under hyperosmotic stress, while the glycohydrolase-inactive mutant  
197 E673A/E674A (34) did not (Fig. 4C and S3I), suggesting that PARylation by  
198 unidentified PARP(s) or PAR per se is required for ASK3 inactivation under  
199 hyperosmotic stress.

200 PAR physicochemically resembles RNA. In addition to RNA, PAR is proposed to  
201 seed condensates (35–38). Considering that ASK3 condensation is required for its  
202 inactivation (Fig. 2), we next investigated the relationship between PAR and ASK3  
203 condensation. Contrary to our expectation, ASK3 condensation under hyperosmotic  
204 stress was not prevented by PAR depletion with FK866 pretreatment or PARG  
205 overexpression (Fig. 4D). However, FRAP of ASK3 condensates was significantly  
206 inhibited by PAR depletion (Fig. 4E and F). Furthermore, PAR inhibited the formation of  
207 solid-like ASK3 condensates in vitro, while NAD could not (Fig. 4G and H). These  
208 results raise the possibility that PAR does not seed but rather lubricates phase-separated  
209 ASK3 for ASK3 inactivation.

210 As a consensus sequence of the PAR-binding motif (PBM), [HKR]<sub>1</sub>-X<sub>2</sub>-X<sub>3</sub>-  
211 [AIQVY]<sub>4</sub>-[KR]<sub>5</sub>-[KR]<sub>6</sub>-[AILV]<sub>7</sub>-[FILPV]<sub>8</sub> is proposed (39). Based on the difference  
212 between ASK3 WT and CT in condensation at the basal state (Fig. 2B), some kind of  
213 inhibitory region is assumed to be present in the region before the C-terminus of ASK3,

214 where the central positively charged [KR]<sub>5</sub>-[KR]<sub>6</sub> is found in 10 sites, named PBM1–10  
215 (Fig. S5A). We thus constructed 10 PBM candidate mutants substituted K/R with A. All  
216 PBM candidate mutants of ASK3 formed condensates under hyperosmotic stress (Fig.  
217 S5B). Between them, the ASK3 PBM4 mutant prominently suppressed its inactivation  
218 under hyperosmotic stress (Fig. S5C). Indeed, while ASK3 WT was  
219 coimmunoprecipitated with PAR by pull-down of the WWE domain (40) (Fig. 4A), the  
220 PBM4 mutant was not (Fig. S5D), suggesting that ASK3 interacts with PAR via the  
221 PBM4 region. Consistent with PAR depletion (Fig. 4E), FRAP of the ASK3 PBM4  
222 mutant was significantly suppressed (Fig. S5E and F). Moreover, the solid-like  
223 condensates of the ASK3 PBM4 mutant in vitro were not dissolved by PAR addition  
224 (Fig. S5G and H). These findings reinforce the notion that PAR keeps ASK3 condensates  
225 in the liquid phase, enabling ASK3 to be inactivated under hyperosmotic stress.

226

## 227 Discussion

228 In general, cells face three types of perturbations after osmotic stress: changes in  
229 mechanical forces in/on the phospholipid bilayer, intracellular strength/concentration of  
230 ions and macromolecular crowding (9). It has been suggested that cells recognize  
231 unsubstantial osmotic stress through these changes. Here, we demonstrated that an  
232 osmosensitive kinase quickly forms liquid-demixing condensates after hyperosmotic  
233 stress, followed by the regulation of its kinase activity. Our computational model and in  
234 vitro assays suggested that the change in macromolecular crowding is a driving force for  
235 the condensation. Although many researchers have recently been seeking osmosensors  
236 in/on the cell membrane, our findings shed light on another mechanism that cells sense  
237 osmotic stress from the inside through LLPS. Our findings are reflective of a theory put  
238 forth in 1987, when Zimmerman and Harrison proposed “*Changes in reaction rates due  
239 to changes in crowding provide, in principle, a simple mechanism by which the cell could  
240 sense changes in its own volume*” (41). We can advance upon and generalize their idea:  
241 cells naturally recognize changes in their volume through phase separation/transition  
242 triggered by changes in macromolecular crowding.

243 Recent studies on LLPS have gradually unveiled the versatile functions of  
244 biomolecular condensates, including the acceleration or suppression of specific reactions,  
245 the buffering effects on specific biomolecule concentrations, and even the selective filters  
246 of nuclear pores (22, 23, 42). In this study, we reported the dual function of ASK3  
247 condensates. One function involves the sensing machinery for osmotic stress. Stress-  
248 sensing condensates were also suggested in yeast under thermal or pH stresses (43).  
249 Interestingly, all of these stresses are bidirectionally induced by deviation from steady  
250 state; thus, the role of liquid-demixing droplets would be rational in quick and reversible  
251 stress recognition. The other is the dephosphorylation/inactivation of ASK3. Because the  
252 dephosphorylation competes with the autophosphorylation of ASK3 at the basal level,  
253 this would be interpreted as not the trigger of the reaction but the acceleration of the  
254 reaction specificity. As another possibility, however, ASK3 condensates may serve as  
255 multifunctional signaling hubs for the whole regulation of ASK3 activity. In fact, the  
256 ASK3 mutants  $\Delta C$  and  $\Delta CCC\Delta CLCR$ , which are unable to form condensates, exhibited  
257 lower kinase activity even under basal conditions (Fig. 2D). Although our confocal  
258 microscopy detected few ASK3 condensates under isoosmotic conditions (Fig. 1A), our

259 computational simulation indicated that small clusters appear stochastically and  
260 transiently under larger grid space (Fig. 1C and Movie S1), which may be related to a  
261 report on local phase separation (44). To explore this possibility, further analyses, such as  
262 the identification of biomolecules within the ASK3 condensates, are needed.

263 PAR consists of three components—a base (adenine), ribose and phosphate—which  
264 are the same as RNA. In many biomolecular condensates, RNA promotes LLPS of RNA-  
265 binding proteins (RBPs) partly because the interaction between RNA and RBPs reduces  
266 the threshold for LLPS (22–24). Likewise, PAR has been reported to promote  
267 condensation (36–38). In contrast, we described that PAR is not a promoter of ASK3  
268 condensates but rather a lubricator. By keeping the liquidity of ASK3 condensates within  
269 the “Goldilocks zone”, PAR provides the opportunity for interaction between ASK3 and  
270 PP6 followed by ASK3 inactivation; otherwise, ASK3 condensates undergo liquid-to-  
271 solid transition (Fig. 4E and S5E), analogous to prion-like RBPs (45).

## 272 273 **Materials and Methods**

274 The key materials used in this study are summarized in Table S1.

### 275 276 **Reagents**

277 FK866 (Cat. #F8557) and  $\beta$ -nicotinamide mononucleotide (NMN; Cat. #N3501) were  
278 purchased from Sigma-Aldrich and dissolved at a final concentration of 1,000x in  
279 dimethyl sulfoxide (DMSO; Sigma-Aldrich, Cat. #D5879) and ultrapure water,  
280 respectively. The solvents were used as each negative control.

### 281 282 **Expression plasmids and siRNAs**

283 Expression plasmids for this study were constructed by standard molecular biology  
284 techniques, and all constructs were verified by sequencing. Human ASK3 cDNA (CDS of  
285 NM\_001001671.3 with c.147C>T, c.574G>A) was previously cloned and subcloned into  
286 pcDNA3/GW (Invitrogen) with an N-terminal FLAG- or HA-tag (16) or into  
287 pcDNA4/TO (Invitrogen) with an N-terminal FLAG- or EGFP-tag (17). Human ASK3  
288 cDNA was also subcloned into pcDNA3 with a C-terminal tdTomato-tag (cDNA was  
289 gifted by M. Davidson, Florida State University, via Addgene: plasmid #54653) or  
290 pcDNA4/TO with an N-terminal Venus- or EGFP-FLAG-tag. EGFP-FLAG-tag was  
291 constructed by connecting EGFP-tag and FLAG-tag with a Gly-Gly linker and subcloned  
292 into pcDNA4/TO. ASK3 mutants  $\Delta$ N (CDS of NM\_001001671.3 with c.1\_1,866del),  $\Delta$ C  
293 (CDS of NM\_001001671.3 with c.147C>T, c.574G>A, c.2,734\_3,939del), NT (CDS of  
294 NM\_001001671.3 with c.147C>T, c.574G>A, c.1,867\_3,939del), KD (CDS of  
295 NM\_001001671.3 with c.1\_1,866del, c.2,734\_3,939del), CT (CDS of NM\_001001671.3  
296 with c.1\_2,712del),  $\Delta$ CCC (CDS of NM\_001001671.3 with c.147C>T, c.574G>A,  
297 c.3,535\_3,675del),  $\Delta$ CLCR (CDS of NM\_001001671.3 with c.147C>T, c.574G>A,  
298 c.3,838\_3,879del),  $\Delta$ CCC $\Delta$ CLCR (CDS of NM\_001001671.3 with c.147C>T,  
299 c.574G>A, c.3,535\_3,675del, c.3,838\_3,879del), CT $\Delta$ IDR1 (CDS of NM\_001001671.3  
300 with c.1\_2,712del, c.2,788\_2,898del), CT $\Delta$ IDR2 (CDS of NM\_001001671.3 with  
301 c.1\_2,712del, c.3,427\_3,540del), CT $\Delta$ IDRs (CDS of NM\_001001671.3 with  
302 c.1\_2,712del, c.2,788\_2,898del, c.3,427\_3,540del), CT $\Delta$ CC (CDS of NM\_001001671.3  
303 with c.1\_2,712del, c.3,535\_3,675del), CT $\Delta$ SAM (CDS of NM\_001001671.3 with  
304 c.1\_2,712del, c.3,718\_3,909del), CT $\Delta$ LCR (CDS of NM\_001001671.3 with

305 c.1\_2,712del, c.3,838\_3,879del), CTACCASAM (CDS of NM\_001001671.3 with  
306 c.1\_2,712del, c.3,535\_3,675del, c.3,718\_3,909del), CTACCLCR (CDS of  
307 NM\_001001671.3 with c.1\_2,712del, c.3,535\_3,675del, c.3,838\_3,879del), PBM1  
308 (R58A/R59A; CDS of NM\_001001671.3 with c.147C>T, c.172CGGCGG>GCCGCC,  
309 c.574G>A), PBM2 (R203A/R204A; CDS of NM\_001001671.3 with c.147C>T,  
310 c.574G>A, c.607AGACGA>GCCGCC), PBM3 (R252A/K253A/R255A; CDS of  
311 NM\_001001671.3 with c.147C>T, c.574G>A, c.754CGGAAA>GCCGCC,  
312 c.763AGA>GCC), PBM4 (R332A/R333A; CDS of NM\_001001671.3 with c.147C>T,  
313 c.574G>A, c.994AGGAGA>GCCGCC), PBM5 (R391A/K392A; CDS of  
314 NM\_001001671.3 with c.147C>T, c.574G>A, c.1,171CGCAA>GCCGCC), PBM6  
315 (R424A/K425A; CDS of NM\_001001671.3 with c.147C>T, c.574G>A,  
316 c.1,270AGGAAA>GCCGCC), PBM7 (R436A/K437A; CDS of NM\_001001671.3 with  
317 c.147C>T, c.574G>A, c.1,306AGAAAA>GCCGCC), PBM8  
318 (R493A/R494A/K496A/K497A; CDS of NM\_001001671.3 with c.147C>T, c.574G>A,  
319 c.1,477CGGCG>GCCGC, c.1,686AAGAAA>GCCGCC), PBM9 (K797A/R798A; CDS  
320 of NM\_001001671.3 with c.147C>T, c.574G>A, c.2,389AAACGT>GCCGCC) and  
321 PBM10 (K895A/R896A; CDS of NM\_001001671.3 with c.147C>T, c.574G>A,  
322 c.2,683AAACGT>GCCGCC) were constructed from full-length ASK3 and subcloned  
323 into pcDNA4/TO with an N-terminal EGFP-FLAG-tag. CIDRs in ASK3 were predicted  
324 using the IUPred2A tool (46) (URL <https://iupred2a.elte.hu/>) (Fig. S2B). PBMs in ASK3  
325 were defined based on the central positively charged [KR]<sub>5</sub>-[KR]<sub>6</sub> in the consensus  
326 sequence (38, 39) (Fig. S5A). The ASK3 PBM4 mutant was also subcloned into  
327 pcDNA3/GW with an N-terminal HA-tag or pcDNA3 with a C-terminal tdTomato-tag.  
328 The ASK3 CT mutant was also subcloned into pcDNA3 with a C-terminal tdTomato-tag.  
329 Human ANKRD52 was cloned previously (17) and subcloned into pcDNA3/GW with a  
330 C-terminal Venus-tag. Human NAMPT (CDS of NM\_005746.2) was cloned from a  
331 cDNA pool derived from HEK293A cells and subcloned into pcDNA3/GW with an N-  
332 terminal FLAG-tag. NAMPT mutants S199D (CDS of NM\_005746.2 with  
333 c.595TC>GA) and S200D (CDS of NM\_005746.2 with c.598TC>GA) (29) were  
334 constructed from full-length NAMPT and subcloned into pcDNA3/GW with an N-  
335 terminal FLAG-tag. Human PPP6R3 (CDS of NM\_001164161.1) with an N-terminal  
336 YFP-tag and human PPP6C (CDS of NM\_002721.4) with a C-terminal HA-tag were  
337 constructed previously (17). Human PARG (CDS of NM\_001303486.1) and human  
338 SIRT2 (CDS of NM\_030593.2) were cloned from a cDNA pool derived from HEK293A  
339 cells and subcloned into pcDNA3/GW with a C-terminal HA-tag. PARG mutant  
340 E673A/E674A (CDS of NM\_001303486.1 with c.2,018AAGAA>CCGCC) (34) was  
341 constructed from full-length PARG and subcloned into pcDNA3/GW with a C-terminal  
342 HA-tag. The wild-type PARG and PARG mutant were also subcloned into pcDNA3/GW  
343 with a C-terminal Venus-tag. Human PABPC1 (CDS of NM\_002568.4) and human  
344 DCP1A (CDS of NM\_018403.7) were cloned from a cDNA pool derived from  
345 HEK293A cells and subcloned into pcDNA3/GW with an N-terminal HA- and Venus-  
346 tag, respectively. Human CD38 (CDS of NM\_001775.3) was cloned from a cDNA pool  
347 derived from A594 cells and subcloned into pcDNA3/GW with a C-terminal HA-tag.  
348 Human PARP1 (CDS of NM\_001618.3) was cloned from a cDNA pool derived from  
349 HeLa cells and subcloned into pcDNA3/GW with an N-terminal HA-tag. WWE domain  
350 in human RNF146 (c.247–549 in CDS of NM\_030963.3) (40, 47) was cloned from a



351 cDNA pool derived from HEK293A cells and subcloned into pcDNA4/TO with an N-  
352 terminal EGFP-FLAG-tag. Empty vectors were used as negative controls.

353 Small interfering RNAs (siRNAs) for human *NAMPT* (#1: 5'-  
354 CCACCGACUCCUACAAGGUUACUCA-3', #2: 5'-  
355 GAUCUUCUCCAUACUGUCUUCAAGA-3', #3: 5'-  
356 GAAUAUUGAACUGGAAGCAGCACAU-3') were purchased as Stealth RNAi siRNAs  
357 from Invitrogen. The target sequences were designed using the Block-iT RNAi Designer  
358 tool (Invitrogen, current URL <https://rnaidesigner.thermofisher.com/rnaiexpress/>). As the  
359 negative control, Stealth RNAi Negative Control Medium GC Duplex #2 (Invitrogen,  
360 Cat. #12935-112) was used.

361

### 362 **Cell culture**

363 HEK293A cells were cultured in Dulbecco's modified Eagle's medium (DMEM)  
364 (Sigma-Aldrich, Cat. #D5671) supplemented with 10% fetal bovine serum (FBS;  
365 BioWest, Cat. #S1560-500) and 100 units/mL penicillin G (Meiji Seika, Cat.  
366 #6111400D2039). Tetracycline-inducible Venus-ASK3-stably expressing HEK293A  
367 (Venus-ASK3-HEK293A) cells were established with the T-REx system (Invitrogen).  
368 Tetracycline-inducible FLAG-ASK3-stably expressing HEK293A (FLAG-ASK3-  
369 HEK293A) cells were established previously (17). Venus-ASK3-HEK293A cells and  
370 FLAG-ASK3-HEK293A cells were cultured in DMEM supplemented with 10% FBS, 2.5  
371  $\mu\text{g}/\text{mL}$  blasticidin (Invitrogen, Cat. #A1113903) and 50  $\mu\text{g}/\text{mL}$  Zeocin (Invitrogen, Cat.  
372 #R25001). To induce Venus-ASK3 or FLAG-ASK3, the cells were pretreated with 1  
373  $\mu\text{g}/\text{mL}$  tetracycline (Sigma-Aldrich, Cat. #T7660) 24 hr before assays. All cells were  
374 cultured in 5%  $\text{CO}_2$  at 37°C and verified to be negative for mycoplasma.

375

### 376 **Transfections**

377 Plasmid transfections were performed with polyethylenimine "MAX" (Polysciences, Cat.  
378 #24765) when HEK293A cells were grown to 95% confluency, according to a previously  
379 described protocol (48) with minor optimization. To reduce cytotoxicity, the cells were  
380 cultured in fresh medium 6–10 hr later, followed by another 40 hr of culture. siRNA  
381 transfections for FLAG-ASK3-HEK293A cells were carried out by forward transfection  
382 using Lipofectamine RNAiMAX (Invitrogen, Cat. #133778-500) and 10 nM siRNAs  
383 once the cells reached 40–80% confluency, according to the manufacturer's instructions.  
384 siRNA transfections for HEK293A cells were carried out by reverse transfection using  
385 Lipofectamine RNAiMAX and 30 nM siRNAs, according to the manufacturer's  
386 instructions.

387

### 388 **Osmotic stress treatments**

389 In live-cell imaging experiments, osmotic stress was applied by adding the 2x osmotic  
390 medium into the culture medium, followed by the incubation in 5%  $\text{CO}_2$  at 37°C. For  
391 isoosmotic conditions ( $\sim 300$  mOsm/kg  $\text{H}_2\text{O}$ ), DMEM supplemented with 10% FBS was  
392 used as the isoosmotic medium. For hyperosmotic stress ( $\sim 400$ ,  $\sim 500$ ,  $\sim 600$  or  $\sim 700$   
393 mOsm/kg  $\text{H}_2\text{O}$ ), DMEM supplemented with 10% FBS and 200, 400, 600 or 800 mM  
394 mannitol was used as the 2x hyperosmotic medium. In the case of NaCl-based  
395 hyperosmotic stress ( $\sim 400$ ,  $\sim 500$  or  $\sim 600$  mOsm/kg  $\text{H}_2\text{O}$ ), DMEM supplemented with  
396 10% FBS and 100, 200 or 300 mM NaCl was used as the 2x hyperosmotic medium. For

397 hypoosmotic stress (~150 or 225 mOsm/kg H<sub>2</sub>O), ultrapure water or 2-fold diluted  
398 isoosmotic medium was used as the 2x hypoosmotic medium.

399 In immunoblotting experiments, osmotic stress was applied by exchanging the culture  
400 medium with osmotic buffer. The isoosmotic buffer (300 mOsm/kg H<sub>2</sub>O, pH 7.4)  
401 contained 130 mM NaCl, 2 mM KCl, 1 mM KH<sub>2</sub>PO<sub>4</sub>, 2 mM CaCl<sub>2</sub>, 2 mM MgCl<sub>2</sub>, 10  
402 mM 4-(2-hydroxyethyl)-1-piperazineethanesulfonic acid (HEPES), 10 mM glucose and  
403 20 mM mannitol. The hyperosmotic buffer (425 or 500 mOsm/kg H<sub>2</sub>O, pH 7.4) was the  
404 same as the isoosmotic buffer but contained 145 or 220 mM mannitol, respectively.  
405 Absolute osmolality was verified by an Osmomat 030 (Gonotec) osmometer to fall within  
406 the range of 295 to 320 mOsm for isoosmotic buffer or  $\pm$  25 mOsm/kg H<sub>2</sub>O for the other  
407 buffers.

408

### 409 **Live-cell imaging**

410 Cells were seeded in 35 mm $\phi$  glass bottom dishes (Matsunami, Cat. #D11130H) coated  
411 with 1% gelatin (Nacalai Tesque, Cat. #16605-42) in phosphate-buffered saline (PBS;  
412 137 mM NaCl, 3 mM KCl, 8 mM Na<sub>3</sub>PO<sub>4</sub>•12H<sub>2</sub>O, 15 mM KH<sub>2</sub>PO<sub>4</sub>). For transfected  
413 HEK293A cells, the cells were reseeded from a 24-well plate into glass bottom dishes 24  
414 hr after transfection. After 36–60 hr, the culture medium was replaced with 1 mL  
415 isoosmotic medium per dish, and the dish was subsequently viewed a TCS SP5 (Leica)  
416 confocal laser-scanning microscope equipped with a stage top incubator (Tokai Hit). The  
417 cells were observed in 5% CO<sub>2</sub> at 37°C using an HC PL APO 63x/1.40 oil objective  
418 (Leica). Multichannel time-lapse images were acquired in 4 fields each with 4 averages  
419 per frame in 1-min or 1.5-min intervals. Venus, EGFP or tdTomato was excited at 514  
420 nm with an argon laser, at 488 nm with an argon laser or at 561 nm with a DPSS laser,  
421 respectively, and detected by a HyD detector (Leica). Differential interference contrast  
422 (DIC) was captured through the transmitted light from either the argon or DPSS laser, the  
423 unused laser in the observation, and detected by a PMT detector (Leica). After obtaining  
424 image sets for 5 min under isoosmotic conditions as the “Before” condition, the cells  
425 were exposed to osmotic stress by adding 1 mL of 2x osmotic medium per dish and  
426 continuously observed for 30 min. Of note, although the cellular morphology was  
427 appreciably changed under osmotic stress, we observed the constant position, XY and  
428 focal plane, by utilizing a motorized stage and the on-demand mode of adaptive focus  
429 control system (Leica) in each field.

430 In the experiments of the dynamics and fusion of ASK3 condensates, single-channel  
431 time-lapse imaging for Venus was performed in a single field with 2 averages per frame  
432 at the minimum interval (~1 sec). To hold a constant position and minimize the  
433 autofocusing time, the continuous mode of adaptive focus control system was applied.  
434 Similarly, the relationship between ANKRD52 and ASK3 condensates was investigated  
435 by 2-channel time-lapse imaging for Venus and tdTomato at the minimum interval (~5  
436 sec).

437 In the experiments of the reversibility of ASK3 condensates, time-lapse images of the  
438 EGFP and DIC channels were captured by the following procedure. After acquiring the  
439 “Before” image sets for 5 min under isoosmotic conditions, the cells were exposed to  
440 hyperosmotic stress (600 mOsm) by adding 1 mL of 2x hyperosmotic medium per dish  
441 and observed for 20 min. Subsequently, the cells were reverted back to isoosmotic  
442 conditions by adding 2 mL of ultrapure water per dish and further observed for 20 min.

443 For presentation, representative raw images were adjusted in brightness and contrast  
444 linearly and equally within the samples by using the GNU Image Manipulation Program  
445 (GIMP; GIMP Development Team, URL <https://www.gimp.org/>) or ImageJ/Fiji (49)  
446 (URL <https://fiji.sc/>) software. Because we used DIC images as a rough confirmation of  
447 cytosol region, automatically optimized adjustment in brightness and contrast was  
448 applied to each DIC image; therefore, the signal intensity of DIC image cannot be  
449 compared among the images. To create a time-lapse video, a series of images were  
450 equally adjusted in brightness and contrast (and assigned colors if multiple channels were  
451 included); captions were added, and the images were converted to a movie file using  
452 ImageJ/Fiji software.

453 For quantification, we established a macro script in ImageJ/Fiji to calculate the count  
454 and size of ASK3 condensates in a cell per frame and applied it to all raw image sets in  
455 batch mode. Briefly, based on a DIC image, the region of interest (ROI) was first defined  
456 as the whole cell area of a main cell because there are condensates from another cell in  
457 some cases. After applying a Gaussian filter, the Venus signal within the ROI was  
458 subsequently extracted from a Venus image in accordance with the local threshold.  
459 Finally, particle analysis was performed. Each parameter was determined from pilot  
460 analyses in Venus-ASK3-HEK293A cells. The exported data table was summarized with  
461 R language on RStudio (RStudio, Inc., URL <https://rstudio.com/>) software. The  
462 ImageJ/Fiji script also exported images of both ROIs and identified particles, enabling us  
463 to confirm the quality. In fact, we excluded several data points from the data analysis: (1)  
464 if the image was out-of-focus, (2) if the target cell was shrunken too much or detached  
465 completely or (3) if the value was an extreme outlier, less than  $Q_1 - 5 \times IQR$  or more  
466 than  $Q_3 + 5 \times IQR$ , where  $Q_1$ ,  $Q_3$  and IQR are the 1st quartile, the 3rd quartile and the  
467 interquartile range, respectively.

#### 468 469 **Fluorescence recovery after photobleaching assay**

470 Ideally, fluorescence recovery after photobleaching (FRAP) should be applied to only a  
471 single condensate. However, ASK3 condensates move around too dynamically and  
472 rapidly to be evaluated by normal FRAP assay; ASK3 condensates go out from the focal  
473 plane and vice versa, for example. Hence, we established and performed a subsequent  
474 FRAP assay for ASK3 condensates under hyperosmotic stress. Prior to the FRAP assay,  
475 ASK3-tdTomato-transfected HEK293A cells were placed under the microscope in 5%  
476 CO<sub>2</sub> at 37°C and exposed to hyperosmotic stress (600 mOsm) for 30 min, which makes  
477 ASK3 condensates relatively stable. Subsequently, single-channel time-lapse imaging for  
478 tdTomato was performed in a single field with 4 averages per frame with a minimum  
479 interval (~2.1 sec) by utilizing the continuous mode of adaptive focus control system.  
480 After acquiring 5 frame as the “Before” condition, a rectangular area that included more  
481 than 10 condensates (with the exception of the ASK3 CT mutant for which 1 condensate  
482 was included) was photobleached by the maximum intensity of the DPSS laser three  
483 times, followed by the time-lapse imaging of 100 intervals as the “After” condition.

484 To quantify the FRAP rate of ASK3 condensates from image data, particle tracking  
485 analysis was first executed for all ASK3 condensates by using a Fiji plugin TrackMate  
486 (50) (URL <https://imagej.net/TrackMate>). In TrackMate, each condensate was identified  
487 in each frame by a Laplacian of Gaussian (LoG) detector, followed by connecting frames  
488 by a linear assignment problem (LAP) tracker. Each parameter was determined from pilot

489 analyses for ASK3(WT)-tdTomato. In this tracking analysis, we excluded the  
490 condensates (1) that were not successfully tracked from “Before” to “After” or (2) that  
491 were present in less than 25 frames. Next, the tracking data table was used to  
492 systematically calculated to the FRAP rate in RStudio software. In the R script, each  
493 tracked condensate was first categorized into 2 groups, photobleached or not-  
494 photobleached, based on the XY coordinates of the photobleached rectangular area.  
495 Meanwhile, the fluorescence intensity value of condensate  $i$  at time  $t$ ,  $F_i(t)$  was converted  
496 to the relative fluorescence change  $F_i(t) / F_{i, \text{Before}}$ , where  $F_{i, \text{Before}}$  indicates the mean of  
497  $F_i(t)$  for each condensate  $i$  in the “Before” condition. At this step, we eliminated a few  
498 false positive condensates in the photobleached group whose  $F_i(t) / F_{i, \text{Before}}$  did not exhibit  
499 at least a 15% decrease between the “Before” and “After” conditions, although  $F_i(t) /$   
500  $F_{i, \text{Before}}$  of the other photobleached condensates dropped by an average of 80% in our  
501 FRAP assays. To correct the quenching effects during observation, each  $F_i(t) / F_{i, \text{Before}}$  in  
502 the photobleached group was normalized to  $G_i(t) = (F_i(t) / F_{i, \text{Before}}) / (\text{the mean of } F_j(t) /$   
503  $F_{j, \text{Before}}$  in the nonphotobleached group). To mitigate the effects of condensate movement  
504 in a direction vertical to the focal plane on the changes in fluorescence,  $G_i(t)$  was further  
505 converted to the mean of  $G_i(t)$  in the photobleached group,  $G(t)$ ; namely, we summarized  
506 all values of the photobleached condensates in a cell into representative values of one  
507 virtual condensate. Finally, the FRAP rate [%] at time  $t$  in the cell was calculated as  $(G(t)$   
508  $- G_{\text{Min}}) / (1 - G_{\text{Min}}) \times 100$ , where  $G_{\text{Min}}$  was the minimum value within the first three time  
509 points of the “After” condition. When summarizing the FRAP rate between cells, we  
510 trimmed a few extreme outliers, less than  $Q_1 - 5 \times \text{IQR}$  or more than  $Q_3 + 5 \times \text{IQR}$ .

511

### 512 **Immunocytochemistry and immunofluorescence**

513 Transfected HEK293A cells were seeded on 15 mm $\phi$  cover slips (Matsunami, Cat.  
514 #C015001) coated with 1% gelatin in PBS in a 12-well plate. After 24–48 hr, the cells  
515 were exposed to osmotic medium or buffer for the indicated period, followed by the  
516 following immunostaining steps: fixation for 15 min with 4% formaldehyde (Wako Pure  
517 Chemical Industries, Cat. #064-00406) in PBS, permeabilization for 15 min with 1%  
518 Triton X-100 (Sigma, Cat. #T9284) in PBS, blocking for 30 min with 5% skim milk  
519 (Megmilk Snow Brand) in TBS-T (50 mM tris(hydroxymethyl)aminomethane (Tris)-HCl  
520 pH 8.0, 150 mM NaCl and 0.05% Tween 20) and incubation at 4°C overnight with the  
521 primary antibodies in 1st antibody dilution buffer (TBS-T supplemented with 5% bovine  
522 serum albumin (BSA; Iwai Chemicals, Cat. #A001) and 0.1% NaN<sub>3</sub> (Nacalai Tesque,  
523 Cat. #312-33)). The cells were further incubated at room temperature in the dark for 1–2  
524 hr with the appropriate fluorophore-conjugated secondary antibodies in TBS-T. After  
525 counterstaining with Hoechst 33258 dye (Dojindo, Cat. #343-07961, 1:2,000) in TBS-T  
526 for 5 min, the cover slips were mounted on glass slides with Fluoromount/Plus  
527 (Diagnostic Biosystems, Cat. #K048). The samples were observed by using an LSM 510  
528 META (Zeiss) or a TCS SP5 microscope with the 63x/1.40 oil objective. To distinguish  
529 the background fluorescence or the “bleed-through” of the other fluorophore from the  
530 true signal, we also confirmed the proper negative control samples in each observation.

531

### 532 **Immunolectron microscopy using ultrathin cryosections**

533 After Venus-ASK3-HEK293A cells were exposed to hyperosmotic stress (800 mOsm, 3  
534 hr), the cells were fixed at room temperature for 10 min with 4% paraformaldehyde

535 (PFA) in 0.1 M phosphate buffer (pH7.2) (PB), followed by the replacement with fresh  
536 4% PFA in PB and incubation at 4°C overnight. Cells were washed 3 times with PBS,  
537 followed by 0.15% glycine in PBS, and embedded in 12% gelatin in 0.1 M PB. Small  
538 blocks were rotated in 2.3 M sucrose in PB at 4°C overnight and quickly plunged into  
539 liquid nitrogen. Sections approximately 60 nm thick were cut using a UC7/FC7  
540 ultramicrotome (Leica) and picked up with a 1:1 mixture of 2% methylcellulose and 2.3  
541 M sucrose in PB. The sections were incubated at 4°C overnight with rabbit anti-GFP  
542 antibody (Frontier Institute, Ishikari, Japan, Cat. GFP-Rb-Af2020), followed by  
543 incubation at room temperature for 1 hr with protein A conjugated to 10-nm gold  
544 particles (protein A-gold; Cell Microscopy Center, University Medical Center Utrecht,  
545 Utrecht, the Netherlands). The sections were embedded in a thin layer of 2%  
546 methylcellulose with 0.4% uranyl acetate (pH 4.0) and observed with a H-7100 (Hitachi)  
547 transmission electron microscope. For control experiments, ultrathin sections were  
548 reacted only with protein A-gold.

549

### 550 **In vitro condensation assay**

551 For protein purification, HEK293A cells were seeded in 10 cm<sup>2</sup> dishes and transfected  
552 with EGFP-FLAG-tagged constructs. After washing with PBS, the cells were lysed in  
553 lysis buffer (20 mM Tris-HCl pH 7.5, 150 mM NaCl, 5 mM ethylene glycol-bis(2-  
554 aminoethylether)-*N,N,N',N'*-tetraacetic acid (EGTA), 1% sodium deoxycholate, 1%  
555 Triton X-100 and 12 mM β-glycerophosphatase) supplemented with protease inhibitors  
556 (1 mM phenylmethylsulfonyl fluoride (PMSF) and 5 μg/mL leupeptin), phosphatase  
557 inhibitor cocktail I (8 mM NaF, 1 mM Na<sub>3</sub>VO<sub>4</sub>, 1.2 mM Na<sub>2</sub>MoO<sub>4</sub>, 5 μM cantharidin and  
558 2 mM imidazole) and 1 mM dithiothreitol (DTT). The cell extracts were collected with a  
559 scraper from 3 dishes into a single microtube for each protein, followed by centrifugation  
560 at 4°C and 13,500 rpm (~16,500 × *g*) for 15 min. The supernatants were incubated with  
561 anti-FLAG antibody beads (Sigma-Aldrich, clone M2, Cat. #A2220) at 4°C for ~3 hr.  
562 The beads were washed 4 times with wash buffer (20 mM Tris-HCl pH 7.5, 500 mM  
563 NaCl, 5 mM EGTA, 1% Triton X-100 and 2 mM DTT) and once with TBS (20 mM Tris-  
564 HCl pH 7.5, 150 mM NaCl and 1 mM DTT). The EGFP-FLAG-tagged proteins were  
565 eluted from the beads with 0.1 mg/mL 3x FLAG peptide (Sigma-Aldrich, Cat. #F4799) in  
566 TBS at 4°C for more than 1 hr, followed by dilution to 40 μM with TBS. The  
567 concentration of the protein was estimated from the absorbance at 280 nm measured by a  
568 SimpliNano (GE healthcare) microvolume spectrophotometer with the extinction  
569 coefficient calculated by using the ExPASy ProtParam tool (51)  
570 (<https://web.expasy.org/protparam/>).

571 The purified EGFP-FLAG-tagged protein was diluted into a sample in a microtube,  
572 whose control conditions were 10 μM EGFP-FLAG-tagged protein, 150 mM NaCl, 20  
573 mM Tris (pH 7.5), and 1 mM DTT. When increasing the macromolecular crowding,  
574 Ficoll PM400 (GE Healthcare, Cat. #17-0310-10) or polyethylene glycol 4000 (PEG;  
575 Kanto Kagaku, Cat. #32828-02) was included in the sample at the indicated  
576 concentration. When modifying the ion strength and concentration, the concentration of  
577 NaCl was changed as indicated. When investigating the effects of poly(ADP-ribose)  
578 (PAR) on ASK3 condensates, 20% PEG was added as a crowding reagent, and the  
579 indicated concentration of PAR polymer (Trevigen, Cat. #4336-100-01) or β-  
580 nicotinamide adenine dinucleotide (NAD; Sigma-Aldrich, Cat. #N7004) in TE (10 mM

581 Tris-HCl pH 8.0 and 1 mM ethylenediaminetetraacetic acid (EDTA)) was also added.  
582 The prepared sample was subsequently incubated at 4°C for 15 min. The reaction mixture  
583 was immediately loaded into a counting chamber with a cover slip (Matsunami, Cat. #  
584 C018241), followed by observation using a TCS SP5 microscope with a 63x/1.40 oil  
585 objective. To maintain a constant focal plane even if there were no condensates, we set  
586 the focal plane adjacent to the surface of the cover slip by utilizing the motorized stage  
587 and the on-demand mode of adaptive focus control system. Images of the EGFP signal  
588 were captured from 5 random fields per sample. The above protein purification  
589 procedures were performed in each independent experiment. Of note, when we  
590 photobleached the fluorescence of ASK3 condensates, we could not observe FRAP;  
591 therefore, the condensates produced by our in vitro assays are solid-like, possibly because  
592 the maturation of ASK3 condensation occurs too fast in vitro.

593 For presentation, representative raw images were adjusted in brightness and contrast  
594 linearly and equally within the samples using ImageJ/Fiji software. For quantification, we  
595 established a macro script in ImageJ/Fiji to calculate the fluorescent intensity and area of  
596 ASK3 condensates in each sample and applied the script to all raw image sets in batch  
597 mode. In the script, a Gaussian filter and background correction were applied to each  
598 image, followed by particle analysis. Each parameter was determined from pilot analyses  
599 for EGFP-FLAG-ASK3 WT. The exported data table was further summarized in RStudio  
600 software. In the R script, the amount of ASK3 condensates in a sample was defined as the  
601 mean of total intensity within 5 fields. When investigating the effects of PAR, the amount  
602 value was divided by the amount of the internal standard sample, i.e., the control sample  
603 without TE addition. When comparing the effects of PAR between ASK3 mutants, the  
604 amount value was converted to the amount relative to the mean of the control sample  
605 between experiments.

606

### 607 **Immunoblotting**

608 Cells were lysed in lysis buffer (20 mM Tris-HCl pH 7.5, 150 mM NaCl, 10 mM EDTA,  
609 1% sodium deoxycholate, and 1% Triton X-100) supplemented with protease inhibitors  
610 (1 mM PMSF and 5 µg/mL leupeptin). When detecting the phosphorylation of  
611 endogenous proteins, phosphatase inhibitor cocktail II (20 mM NaF, 30 mM β-  
612 glycerophosphatase, 2.5 mM Na<sub>3</sub>VO<sub>4</sub>, 3 mM Na<sub>2</sub>MoO<sub>4</sub>, 12.5 µM cantharidin and 5 mM  
613 imidazole) was also supplemented. When detecting the PARsylated proteins, 1 mM  
614 nicotinamide (Sigma-Aldrich, Cat. #N0078) and 100 µM gallotanin (Sigma-Aldrich, Cat.  
615 #403040) were also supplemented as PARP and PARG inhibitors, respectively. Cell  
616 extracts were clarified by centrifugation at 4°C and 13,500 rpm (~16,500 × g) for 15 min,  
617 and the supernatants were sampled by adding 2x sample buffer (80 mM Tris-HCl pH 8.8,  
618 80 µg/mL bromophenol blue, 28.8% glycerol, 4% sodium dodecyl sulfate (SDS) and 10  
619 mM DTT). After boiling at 98°C for 3 min, the samples were resolved by SDS-PAGE  
620 and electroblotted onto a BioTrace PVDF (Pall), FluoroTrans W (Pall) or Immobilon-P  
621 (Millipore, Cat. #IPVH00010) membrane. The membranes were blocked with 2.5% or  
622 5% skim milk in TBS-T and probed with the appropriate primary antibodies diluted by  
623 the 1st antibody dilution buffer. After replacing and probing the appropriate secondary  
624 antibodies diluted with skim milk in TBS-T, antibody-antigen complexes were detected  
625 on X-ray films (FUJIFILM, Cat. #47410-07523, #47410-26615 or #47410-07595) using

626 an enhanced chemiluminescence system (GE Healthcare). The films were converted to  
627 digital images by using a conventional scanner without any adjustment.

628 For presentation, representative images were acquired by linearly adjusting the  
629 brightness and contrast using GIMP software. When digitally trimming superfluous lanes  
630 from blot images, the procedure was executed after the adjustment, and the trimming was  
631 clearly indicated. Quantification was performed against the raw digital images with  
632 densitometry using Fiji/ImageJ software (17). “Kinase activity”, “Interaction” and  
633 “PARsylated proteins” were defined as the band intensity ratio of phosphorylated protein  
634 to total protein, the band intensity ratio of coimmunoprecipitated protein to input protein  
635 and the band intensity ratio of PARsylated proteins to actin, respectively. For the kinase  
636 activity of endogenous ASK3, the ratio of phosphorylated ASK to ASK3 was calculated.  
637

### 638 **Coimmunoprecipitation assay**

639 The supernatants of cell extracts were incubated with anti-FLAG antibody beads (Wako  
640 Pure Chemicals Industries, clone 1E6, Cat. #016-22784) for 30–120 min at 4°C. The  
641 beads were washed twice with wash buffer (20 mM Tris-HCl pH 7.5, 500 mM NaCl, 1%  
642 sodium deoxycholate, 1% Triton X-100, 0.2% SDS) and once with lysis buffer, followed  
643 by the direct addition of 2x sample buffer.  
644

### 645 **Computational model and simulation**

646 To understand the essential principles of ASK3 condensation in a cell under  
647 hyperosmotic stress, we utilized and developed the previously reported simple  
648 computational model (18) with the effects of macromolecule crowding (Fig. S1G).  
649 According to the previous model, each single unit of self-associating ASK3 protein is  
650 regarded as an even square that occupies a lattice in a two-dimensional grid space  
651 corresponding to a single cell. When an ASK3 unit is adjacent to another, the ASK3 units  
652 have a binding relationship, which is independent of other binding pairs. Each ASK3 unit  
653 has no relationship between nonadjacent ASK3. A cluster of consecutive multiple ASK3  
654 units is considered as a condensate in cells, which can be assumed to be a liquid-like or  
655 solid-like condensate depending on the system parameters mentioned below. At each  
656 time step, an ASK3 unit can move to an adjacent lattice. Given the original position of  
657 the ASK3 unit, this movement is categorized into three physicochemical actions: (1)  
658 diffusion, (2) exchange/vibration and (3) unbinding. If there are no neighboring ASK3  
659 units before the movement (the destination 1 in Fig. S1G), the movement is considered  
660 simple diffusion with the rate constant  $k_1$ . If there is more than one neighboring ASK3  
661 unit before the movement and if the destination position is already occupied by one of the  
662 neighbors (the destination 2 in Fig. S1G), the movement corresponds to an exchange  
663 between the ASK3 units in a cluster, namely, a rearrangement process within a liquid-like  
664 condensate. This exchange action is obeyed by the rate constant  $k_2$ . When  $k_2$  is small, the  
665 action is considered vibration of ASK3 in a solid-like condensate. If there is more than  
666 one neighboring ASK3 units before the movement and if the destination position is  
667 occupied by none of the neighbors (the destination 3a–c in Fig. S1G), the movement can  
668 be accompanied by breakages of the binding relationships with the neighbors, i.e., the  
669 unbinding reaction. According to the simple Arrhenius equation, a rate constant of this  
670 overall unbinding movement  $k_3$  is defined as  $k_3 = A \times \exp(-\Delta E \times n_{\text{lost}} / \theta)$ , where  $A$  is a  
671 frequency factor,  $\Delta E$  is an activation energy in the unbinding reaction between a single

672 pair of ASK3 units,  $n_{\text{lost}}$  is the number of neighboring ASK3 units whose binding  
673 relationship with the ASK3 unit to move will be lost by the movement, and  $\theta$  is a  
674 temperature-like constant. Notably, the unbinding movement of ASK3 unit includes not  
675 only the dissociation process from the condensate but also the rearrangement process of  
676 the condensate (compare the destination 3a with the destinations 3b and 3c in Fig. S1G).  
677 Moreover, due to the penalty factor  $n_{\text{lost}}$ , the rearrangement that increases the surface of  
678 condensate (regarded as blue-colored positions in Fig. S1G for the clusters of 2 ASK3  
679 units, for example) is less likely than the rearrangement that maintains in most cases  
680 (consider all potential patterns of the case when the destination 4b in Fig. S1G is  
681 occupied by not obstacle but ASK3 unit, for example). When  $n_{\text{lost}} = 0$  (the destination 3c  
682 in Fig. S1G), that is,  $k_3 = A$ , the unbinding movement is considered a shape-modified  
683 rearrangement process of the condensate with a void unbinding reaction. In our model,  
684 obstacles were further added to reflect on the effects of macromolecular crowding in a  
685 cell. Each obstacle basically has the same properties as ASK3 unit; the obstacles takes the  
686 same size and shape as ASK3 unit, occupies a grid element and can move to an adjoining  
687 position. However, each obstacle has neither a binding relationship with ASK3 units nor  
688 one with the other obstacles, that is, each obstacle has neither a positive nor a negative  
689 effect on the other molecules. Hence, in addition to the above three physicochemical  
690 actions of an ASK3 unit, a new action arises: (4) reflection. If the destination position is  
691 occupied by an obstacle (the destination 4a and 4b in Fig. S1G), the ASK3 unit is not  
692 able to move to the destination; therefore, the ASK3 unit is reflected by the obstacle and  
693 “moves to” the original position according to the rate constant  $k_4$ . Simultaneously, the  
694 movement of an obstacle is categorized into three physicochemical actions: (5) diffusion,  
695 (6) reflection by an ASK3 unit and (7) reflection by an obstacle. If the destination  
696 position is unoccupied (the destination 5 in Fig. S1G), the movement is simple diffusion  
697 of the obstacle according to the rate constant  $k_5$ . If the destination position is already  
698 occupied by an ASK3 unit or another obstacle (the destination 6 or 7 in Fig. S1G), the  
699 movement corresponds to reflection by the ASK3 unit or the other obstacle, and the  
700 obstacle “moves to” the original position depending on the rate constant  $k_6$  or  $k_7$ ,  
701 respectively. We note that the ASK3 unit in our model may not necessarily correspond to  
702 a monomer of a single ASK3 peptide in the real world but homo-oligomer(s) of ASK3 or  
703 even hetero-oligomer(s). Likewise, the obstacle unit in our model is a virtual molecule  
704 that corresponds to the integration of subcellular molecules in the real world, such as  
705 macromolecules, small molecules and ions.

706 To simulate with the model in silico, we computed random trajectories of both ASK3  
707 units and obstacles using the rejection kinetic Monte Carlo (rKMC) method in Python  
708 language. Briefly, the Python script executed the following algorithm. First, all ASK3  
709 units and obstacles were randomly located in the grid space as an initial condition. Next,  
710 a target molecule with a chance to move was randomly picked from the union of the  
711 ASK3 unit and obstacle populations, followed by the random selection of a potential  
712 destination position of the selected target. As mentioned in the above model description,  
713 the designation of the target and destination systematically assigned  $k$ , the rate constant of  
714 the potential movement. At the same time, a random number  $r$  was acquired from the  
715 interval  $[0, 1)$ . If  $k \geq r$ , the movement was accepted, and the target was renewed at the  
716 position of the destination, although the target was “renewed” at the original position in  
717 cases of reflection. Otherwise, if  $k < r$ , the movement was denied, and the target stayed at



718 the original position. After this determination, the iteration step number was incremented  
719 by one, and the next iteration step began by randomly selecting the next target molecule.

720 In the simulation, we regarded  $k_4$ ,  $k_6$  and  $k_7$  as dummy constants, and we ignored their  
721 calculations for the reflection processes because the target molecule remained at its  
722 original position in all cases. Since the goal of the computational simulation in this study  
723 was not to understand the phase of condensates but to understand the driving force of  
724 ASK3 condensation, we also regarded  $k_2$  as a dummy constant and ignored its calculation  
725 for the exchange/vibration process. We set  $k_1 = 1$ ; therefore, free diffusion of ASK3 was  
726 always accepted. In contrast, we set  $k_5 = 0.01$ ; therefore, the diffusion of an obstacle was  
727 slower than diffusion of ASK3 unit. This assumption is not unusual because each  
728 virtually integrated obstacle is considered the average movement of the constituent  
729 molecules, whose movement vectors mostly cancel each other out. For the critical  
730 penalty-defining constant  $k_3$ , we set  $A = 1$  to adjust  $k_3 = 1$  under the condition where  $n_{\text{lost}}$   
731  $= 0$  and fixed  $\Delta E / \theta = 1$  for simplicity; hence, the maximum speed of ASK3 for moving  
732 within the condensate was identical to  $k_1 (= 1)$ , the free diffusion of ASK3 out of  
733 condensate. Of note, the sampling distribution of  $k_3$  in our simulation well satisfied  
734 exponential decay curve, that is, rejection sampling was confirmed. We prepared 500  
735 ASK3 units with or without 1,500 obstacle units in the grid space. To create the condition  
736 under osmotic stress, we changed only the grid space, ranging from  $50 \times 50$  to  $120 \times 120$   
737 squares.

738 For figure presentation, our Python script saved the coordinates of each molecules,  
739 which was rendered using RStudio software. For movie presentation, our Python script  
740 also saved representative images at every 10,000 or 100,000 iteration steps, defined as the  
741 unit of time  $t$ . To make a time-lapse video, a series of images with added captions were  
742 converted to a movie file using ImageJ/Fiji software. For quantification, our Python script  
743 also calculated the count and size of the ASK3 clusters at every iteration step. To mimic  
744 confocal microscopy observations, a cluster of condensates was defined as a cluster of  $\geq 6$   
745 consecutive ASK3 units. The exported data table was summarized in RStudio software.

746

#### 747 **Data analysis and statistical analysis**

748 The data are summarized as the mean  $\pm$  SEM with the exception of boxplots. No  
749 statistical method was utilized to predetermine the sample size. Based on the small  
750 sample size and the quality-oriented immunoblotting assays, homoscedasticity was  
751 assumed unless  $P < 0.01$  in an  $F$ -test or Levene's test based on the absolute deviations  
752 from the median. Statistical tests, the number of samples and the sample sizes are  
753 indicated in Table S2. Statistical tests were performed using R with RStudio software,  
754 and  $P < 0.05$  was considered statistically significant. In several experiments, a few  
755 samples were excluded because they satisfied the criteria clearly outlined in the above  
756 sections. The investigators were not blinded to allocation during experiments and  
757 outcome assessments. The experiments were not randomized. However, the experiments  
758 were performed across different passages of cells, and the cells in the control and treated  
759 groups were seeded from the same population of cells.

760

#### 761 **Data availability**

762 Almost all data are included in the main text or the supplementary materials. Further  
763 information and requests for resources and reagents should be directed to K.W. and H.I.

764

## 765 **Supplementary Materials**

- 766 • Supplementary Text
- 767 • Fig. S1. Characteristics of ASK3 condensates.
- 768 • Fig. S2. CCC and CLCR of ASK3 are critical for the ability of ASK3 to condense.
- 769 • Fig. S3. Quantification of immunoblotting data in main figures.
- 770 • Fig. S4. Major NAD-consuming enzymes suppress ASK3 activity under hyperosmotic
- 771 stress.
- 772 • Fig. S5. ASK3 mutants of PAR-binding motif candidates.
- 773 • Table S1. List of key resources.
- 774 • Table S2. Summary of statistical analysis.
- 775 • Movie S1. A computational simulation for the relationship between the grid space and
- 776 the number/size of ASK3 clusters.
- 777 • Movie S2. Dynamics and fusion of ASK3 condensates in Venus-ASK3-stably
- 778 expressing HEK293A cells.
- 779 • Movie S3. A computational prediction for ASK3 cluster disassembly after the grid
- 780 space expansion.
- 781 • Movie S4. Relationship between ANKRD52 and ASK3 condensates in HEK293A cells.

782

## 783 **References and Notes**

- 784 1. M. L. McManus, K. B. Churchwell, K. Strange, Regulation of cell volume in health and
- 785 disease. *N. Engl. J. Med.* **333**, 1260–6 (1995).
- 786 2. R. L. Rungta *et al.*, The cellular mechanisms of neuronal swelling underlying cytotoxic
- 787 edema. *Cell.* **161**, 610–621 (2015).
- 788 3. V. Compan *et al.*, Cell volume regulation modulates NLRP3 inflammasome activation.
- 789 *Immunity.* **37**, 487–500 (2012).
- 790 4. J. Jantsch *et al.*, Cutaneous Na<sup>+</sup> storage strengthens the antimicrobial barrier function of
- 791 the skin and boosts macrophage-driven host defense. *Cell Metab.* **21**, 493–501 (2015).
- 792 5. L. S. King, D. Kozono, P. Agre, From structure to disease: the evolving tale of aquaporin
- 793 biology. *Nat. Rev. Mol. Cell Biol.* **5**, 687–698 (2004).
- 794 6. L. Hooper, D. Bunn, F. O. Jimoh, S. J. Fairweather-Tait, Water-loss dehydration and
- 795 aging. *Mech. Ageing Dev.* **136–137**, 50–58 (2014).
- 796 7. M. D. Allen, D. A. Springer, M. B. Burg, M. Boehm, N. I. Dmitrieva, Suboptimal
- 797 hydration remodels metabolism, promotes degenerative diseases, and shortens life. *JCI*
- 798 *Insight.* **4** (2019), doi:10.1172/jci.insight.130949.
- 799 8. F. Lang *et al.*, Functional significance of cell volume regulatory mechanisms. *Physiol.*
- 800 *Rev.* **78**, 247–306 (1998).
- 801 9. E. K. Hoffmann, I. H. Lambert, S. F. Pedersen, Physiology of cell volume regulation in
- 802 vertebrates. *Physiol. Rev.* **89**, 193–277 (2009).
- 803 10. T. J. Jentsch, VRACs and other ion channels and transporters in the regulation of cell
- 804 volume and beyond. *Nat. Rev. Mol. Cell Biol.* **17**, 293–307 (2016).
- 805 11. J. M. Wood, Osmosensing by bacteria. *Sci. STKE.* **2006**, pe43 (2006).
- 806 12. K. Tatebayashi *et al.*, Transmembrane mucins Hkr1 and Msb2 are putative osmosensors in
- 807 the SHO1 branch of yeast HOG pathway. *EMBO J.* **26**, 3521–33 (2007).
- 808 13. F. Yuan *et al.*, OSCA1 mediates osmotic-stress-evoked Ca<sup>2+</sup> increases vital for
- 809 osmosensing in Arabidopsis. *Nature.* **514**, 367–371 (2014).

- 810 14. W. Liedtke *et al.*, Vanilloid receptor-related osmotically activated channel (VR-OAC), a  
811 candidate vertebrate osmoreceptor. *Cell*. **103**, 525–35 (2000).
- 812 15. R. Strotmann, C. Harteneck, K. Nunnenmacher, G. Schultz, T. D. Plant, OTRPC4, a  
813 nonselective cation channel that confers sensitivity to extracellular osmolarity. *Nat. Cell*  
814 *Biol.* **2**, 695–702 (2000).
- 815 16. I. Naguro *et al.*, ASK3 responds to osmotic stress and regulates blood pressure by  
816 suppressing WNK1-SPAK/OSR1 signaling in the kidney. *Nat. Commun.* **3**, 1285 (2012).
- 817 17. K. Watanabe, T. Umeda, K. Niwa, I. Naguro, H. Ichijo, A PP6-ASK3 Module  
818 Coordinates the Bidirectional Cell Volume Regulation under Osmotic Stress. *Cell Rep.* **22**,  
819 2809–2817 (2018).
- 820 18. E. Dine, A. A. Gil, G. Uribe, C. P. Brangwynne, J. E. Toettcher, Protein Phase Separation  
821 Provides Long-Term Memory of Transient Spatial Stimuli. *Cell Syst.* **6**, 655-663.e5  
822 (2018).
- 823 19. A. P. Minton, How can biochemical reactions within cells differ from those in test tubes?  
824 *J. Cell Sci.* **119**, 2863–2869 (2006).
- 825 20. N. L. Kedersha, M. Gupta, W. Li, I. Miller, P. Anderson, RNA-binding proteins TIA-1  
826 and TIAR link the phosphorylation of eIF-2 alpha to the assembly of mammalian stress  
827 granules. *J. Cell Biol.* **147**, 1431–42 (1999).
- 828 21. J. R. Buchan, R. Parker, Eukaryotic Stress Granules: The Ins and Outs of Translation.  
829 *Mol. Cell.* **36**, 932–941 (2009).
- 830 22. S. F. Banani, H. O. Lee, A. A. Hyman, M. K. Rosen, Biomolecular condensates:  
831 Organizers of cellular biochemistry. *Nat. Rev. Mol. Cell Biol.* **18**, 285–298 (2017).
- 832 23. Y. Shin, C. P. Brangwynne, Liquid phase condensation in cell physiology and disease.  
833 *Science (80-. )*. **357**, eaaf4382 (2017).
- 834 24. S. Boeynaems *et al.*, Protein Phase Separation: A New Phase in Cell Biology. *Trends Cell*  
835 *Biol.* **28**, 420–435 (2018).
- 836 25. S. J. Trevelyan *et al.*, Structure-based mechanism of preferential complex formation by  
837 apoptosis signal-regulating kinases. *Sci. Signal.* **13**, eaay6318 (2020).
- 838 26. B. Stefansson, T. Ohama, A. E. Daugherty, D. L. Brautigan, Protein phosphatase 6  
839 regulatory subunits composed of ankyrin repeat domains. *Biochemistry.* **47**, 1442–1451  
840 (2008).
- 841 27. J. R. Revollo, A. A. Grimm, S. I. Imai, The NAD biosynthesis pathway mediated by  
842 nicotinamide phosphoribosyltransferase regulates Sir2 activity in mammalian cells. *J.*  
843 *Biol. Chem.* **279**, 50754–50763 (2004).
- 844 28. T. Wang *et al.*, Structure of Nampt/PBEF/visfatin, a mammalian NAD<sup>+</sup> biosynthetic  
845 enzyme. *Nat. Struct. Mol. Biol.* **13**, 661–2 (2006).
- 846 29. J. R. Revollo *et al.*, Nampt/PBEF/Visfatin regulates insulin secretion in beta cells as a  
847 systemic NAD biosynthetic enzyme. *Cell Metab.* **6**, 363–75 (2007).
- 848 30. M. Hasmann, I. Schemainda, FK866, a Highly Specific Noncompetitive Inhibitor of  
849 Nicotinamide Phosphoribosyltransferase, Represents a Novel Mechanism for Induction of  
850 Tumor Cell Apoptosis. *Cancer Res.* **63**, 7436–7442 (2003).
- 851 31. S. ichiro Imai, L. Guarente, NAD<sup>+</sup> and sirtuins in aging and disease. *Trends Cell Biol.* **24**,  
852 464–471 (2014).
- 853 32. W. L. Kraus, PARPs and ADP-Ribosylation: 50 Years . . . and Counting. *Mol. Cell.* **58**,  
854 902–910 (2015).

- 855 33. E. Barkauskaite, G. Jankevicius, I. Ahel, Structures and Mechanisms of Enzymes  
856 Employed in the Synthesis and Degradation of PARP-Dependent Protein ADP-  
857 Ribosylation. *Mol. Cell.* **58**, 935–946 (2015).
- 858 34. N. Le May *et al.*, Poly (ADP-Ribose) Glycohydrolase Regulates Retinoic Acid Receptor-  
859 Mediated Gene Expression. *Mol. Cell.* **48**, 785–798 (2012).
- 860 35. A. K. L. Leung, Poly(ADP-ribose): An organizer of cellular architecture. *J. Cell Biol.* **205**,  
861 613–619 (2014).
- 862 36. A. Patel *et al.*, A Liquid-to-Solid Phase Transition of the ALS Protein FUS Accelerated by  
863 Disease Mutation. *Cell.* **162**, 1066–1077 (2015).
- 864 37. M. Altmeyer *et al.*, Liquid demixing of intrinsically disordered proteins is seeded by  
865 poly(ADP-ribose). *Nat. Commun.* **6**, 8088 (2015).
- 866 38. L. McGurk *et al.*, Poly(ADP-Ribose) Prevents Pathological Phase Separation of TDP-43  
867 by Promoting Liquid Demixing and Stress Granule Localization. *Mol. Cell.* **71**, 703-  
868 717.e9 (2018).
- 869 39. J.-P. Gagné *et al.*, Proteome-wide identification of poly(ADP-ribose) binding proteins and  
870 poly(ADP-ribose)-associated protein complexes. *Nucleic Acids Res.* **36**, 6959–76 (2008).
- 871 40. Z. Wang *et al.*, Recognition of the iso-ADP-ribose moiety in poly(ADP-ribose) by WWE  
872 domains suggests a general mechanism for poly (ADP-ribosyl)ation-dependent  
873 ubiquitination. *Genes Dev.* **26**, 235–240 (2012).
- 874 41. S. B. Zimmerman, B. Harrison, Macromolecular crowding increases binding of DNA  
875 polymerase to DNA: An adaptive effect. *Proc. Natl. Acad. Sci. U. S. A.* **84**, 1871–1875  
876 (1987).
- 877 42. H. B. Schmidt, D. Görlich, Transport Selectivity of Nuclear Pores, Phase Separation, and  
878 Membraneless Organelles. *Trends Biochem. Sci.* **41**, 46–61 (2016).
- 879 43. J. A. Riback *et al.*, Stress-Triggered Phase Separation Is an Adaptive, Evolutionarily  
880 Tuned Response. *Cell.* **168**, 1028-1040.e19 (2017).
- 881 44. D. Bracha *et al.*, Mapping Local and Global Liquid Phase Behavior in Living Cells Using  
882 Photo-Oligomerizable Seeds. *Cell*, 1467–1480 (2018).
- 883 45. S. Maharana *et al.*, RNA buffers the phase separation behavior of prion-like RNA binding  
884 proteins. *Science.* **360**, 918–921 (2018).
- 885 46. B. Mészáros, G. Erdos, Z. Dosztányi, IUPred2A: context-dependent prediction of protein  
886 disorder as a function of redox state and protein binding. *Nucleic Acids Res.* **46**, W329–  
887 W337 (2018).
- 888 47. P. A. DaRosa *et al.*, Allosteric activation of the RNF146 ubiquitin ligase by a poly(ADP-  
889 ribosylation) signal. *Nature.* **517**, 223–226 (2014).
- 890 48. P. A. Longo, J. M. Kavran, M.-S. Kim, D. J. Leahy, Transient mammalian cell  
891 transfection with polyethylenimine (PEI). *Methods Enzymol.* **529**, 227–40 (2013).
- 892 49. J. Schindelin *et al.*, Fiji: an open-source platform for biological-image analysis. *Nat.*  
893 *Methods.* **9**, 676–82 (2012).
- 894 50. J.-Y. Tinevez *et al.*, TrackMate: An open and extensible platform for single-particle  
895 tracking. *Methods.* **115**, 80–90 (2017).
- 896 51. E. Gasteiger *et al.*, in *The Proteomics Protocols Handbook* (Humana Press, Totowa, NJ,  
897 2005; <http://link.springer.com/10.1385/1-59259-890-0:571>), pp. 571–607.  
898

## 899 Acknowledgments

900 **Acknowledgments:** We thank M. Davidson (Florida State University) for providing  
901 tdTomato cDNA via Addgene; all current and former members of the Laboratory of Cell

902 Signaling for valuable materials and fruitful discussions. **Funding:** This work was  
903 supported by the Japan Agency for Medical Research and Development (AMED) under  
904 the Project for Elucidating and Controlling Mechanisms of Aging and Longevity (grant  
905 number JP19gm5010001 to H.I.) and by the Japan Society for the Promotion of Science  
906 (JSPS) under the Grants-in-Aid for Scientific Research (KAKENHI; grant numbers  
907 JP18H03995 to H.I., JP18H02569 to I.N. and JP19K16067 to K.W.). **Author**  
908 **contributions:** K.W., I.N. and H.I. conceptualized and supervised this project. K.W.  
909 designed and performed almost all experiments. K.W. and K.M. established the  
910 computational model, and K.M. performed the computational simulation. K.M., X.Z. and  
911 S.S. helped with some experiments. Y.U. and M.K. performed the TEM analysis. K.W.  
912 visualized and statistically analyzed all the data. K.W., I.N. and H.I. wrote the  
913 manuscript. **Competing interests:** We declare no competing interests. **Data and**  
914 **materials availability:** Almost all data are included in the main text or the  
915 supplementary materials. Further information and requests for resources and reagents  
916 should be directed to K.W. and H.I.  
917  
918

## 919 Figures and Tables

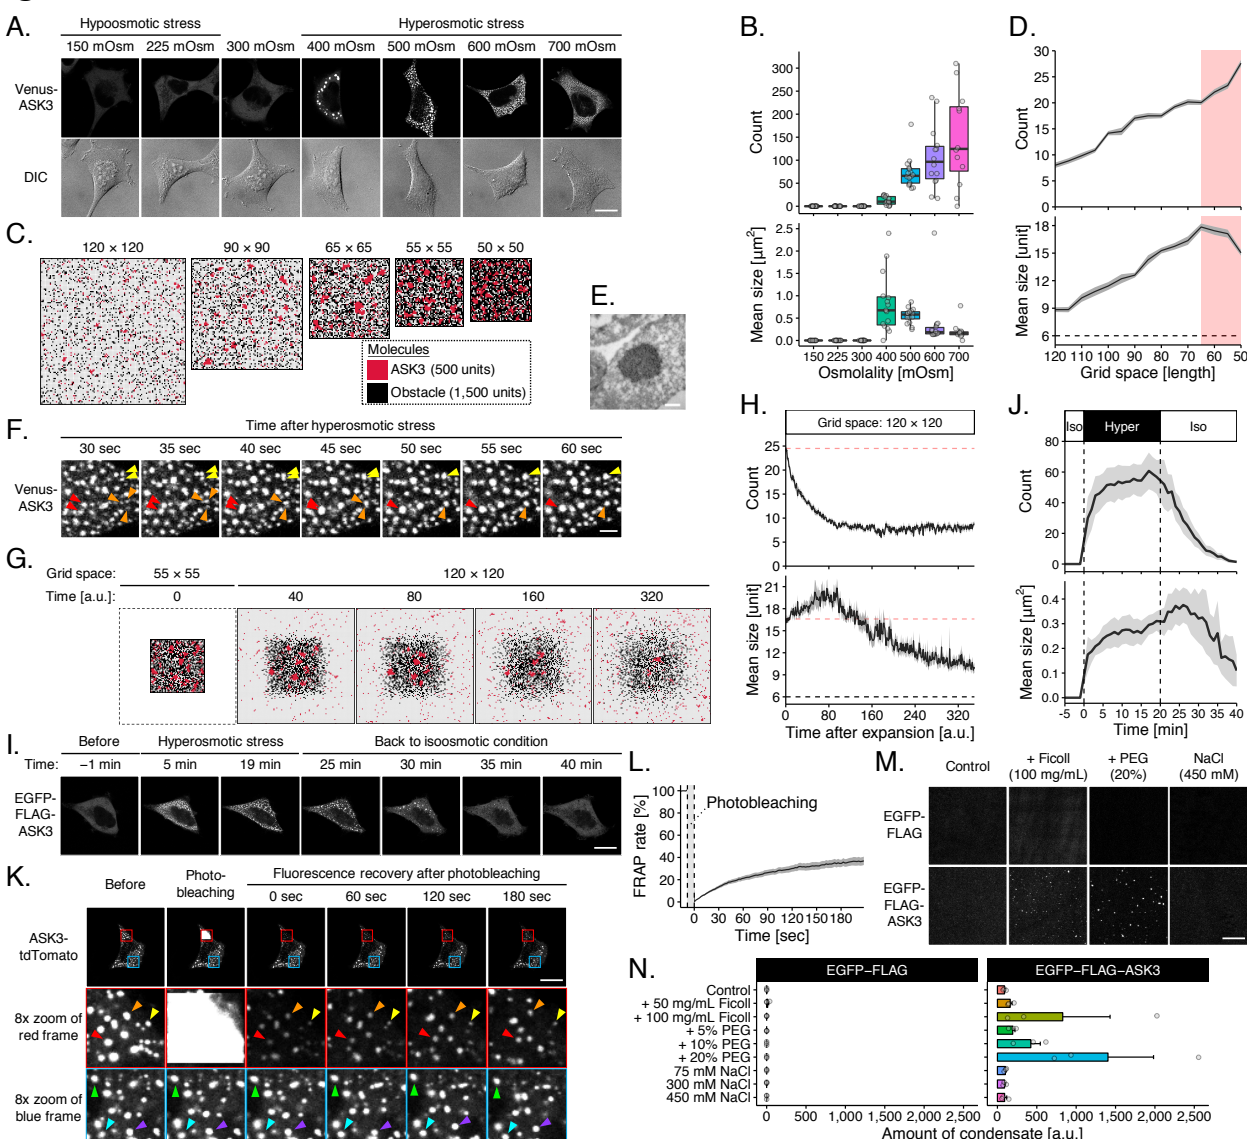

920

921

922

923

924

925

926

927

928

929

930

931

932

933

934

**Fig. 1. ASK3 forms liquid-demixing condensates under hyperosmotic stress. (A and B)** Subcellular localization of ASK3 5 min after osmotic stress in Venus-ASK3-stably expressing HEK293A (Venus-ASK3-HEK293A) cells. Hypoosmotic stress: ultrapure water-diluted medium, hyperosmotic stress: mannitol-supplemented medium, DIC: differential interference contrast, white bar: 20  $\mu\text{m}$ .  $n = 12-16$  cells (pooled from 4 independent experiments). Note that the signal intensity of DIC cannot be compared among the images. **(C and D)** A computational simulation for the relationship between the grid space and the number/size of ASK3 clusters. Pale red shading: the assumed range corresponding to hyperosmotic stress (details in Supplementary Text), dashed line: the minimum of clusters definition. Data: mean  $\pm$  SEM,  $n = 18$ . **(E)** TEM analysis with immunogold labelling for ASK3. Venus-ASK3-HEK293A cells were sampled after hyperosmotic stress (800 mOsm, 3 hr). White bar: 250 nm. **(F)** Dynamics and fusion of ASK3 condensates in Venus-ASK3-HEK293A cells. Hyperosmotic stress: 500 mOsm, white bar: 2  $\mu\text{m}$ . **(G and H)** A computational prediction for the number/size of ASK3

935 clusters after grid space expansion. Pale red dashed line: the initial values, black dashed  
936 line: the minimum of clusters definition. Data: mean  $\pm$  SEM,  $n = 12$ . (**I** and **J**)  
937 Reversibility of ASK3 condensates in EGFP-FLAG-ASK3-transfected HEK293A cells.  
938 After hyperosmotic stress (600 mOsm, 20 min), the extracellular osmolality was set back  
939 to the isoosmotic condition. White bar: 20  $\mu$ m. Data: mean  $\pm$  SEM,  $n = 8$  cells (pooled  
940 from 3 independent experiments). (**K** and **L**) FRAP assay for ASK3 condensates in  
941 ASK3-tdTomato-transfected HEK293A cells. Prior to the assay, cells were exposed to  
942 hyperosmotic stress (600 mOsm, 30 min). White bar: 20  $\mu$ m. Data: mean  $\pm$  SEM,  $n = 15$   
943 cells (pooled from 5 independent experiments). (**M** and **N**) ASK3 condensation in vitro.  
944 Control: 150 mM NaCl, 20 mM Tris (pH 7.5), 1 mM DTT, 15-min incubation on ice.  
945 White bar: 10  $\mu$ m. Data: mean  $\pm$  SEM,  $n = 3$ .  
946

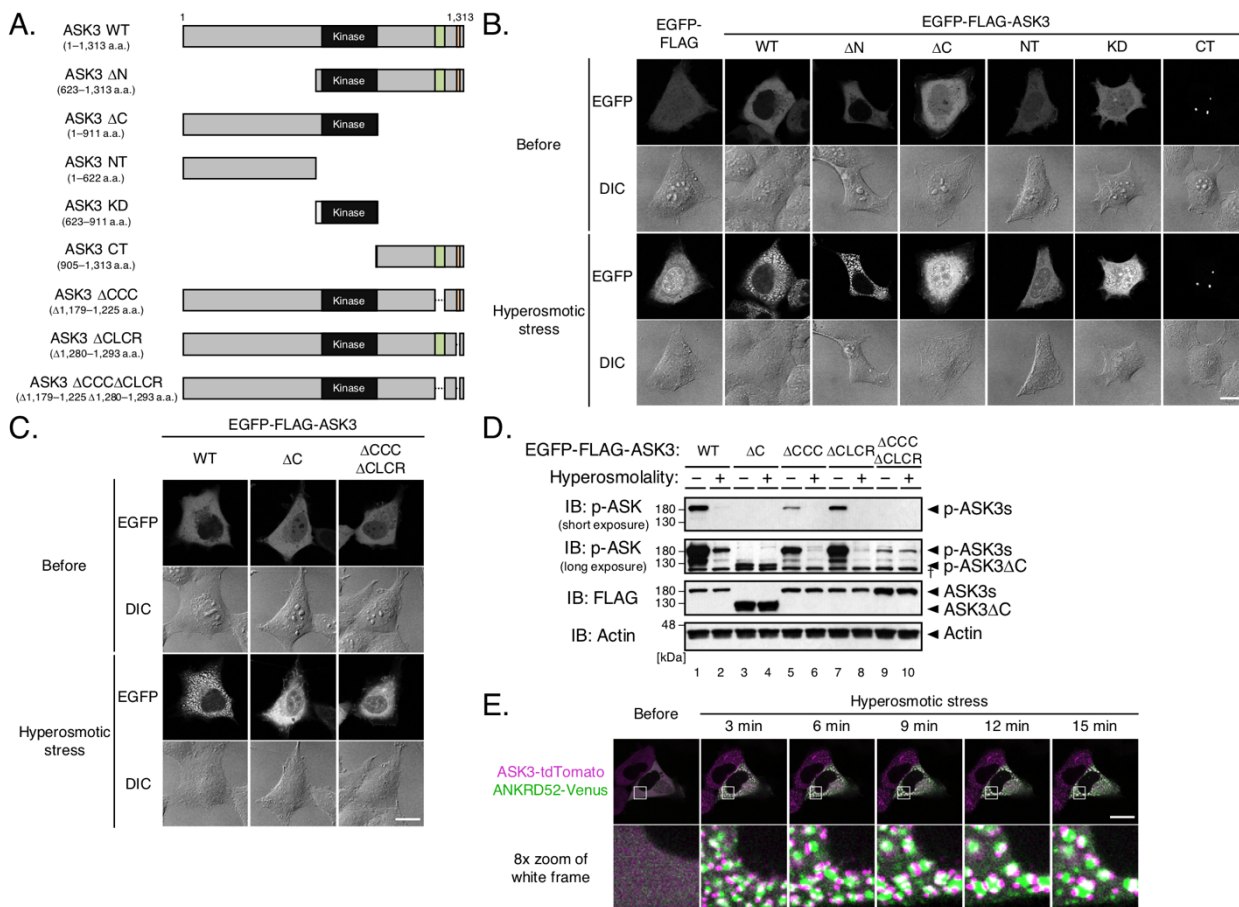

**Fig. 2. ASK3 condensation is required for ASK3 inactivation under hyperosmotic stress.** (A) Schematic representation of ASK3 deletion mutants. The numbers indicate the amino acid (a.a.) positions in wild-type (WT). Black rectangle: kinase domain (652–908 a.a.), green rectangle: C-terminus coiled-coil domain (CCC: 1,179–1,225 a.a.), orange rectangle: C-terminus low complexity region (CLCR: 1,280–1,293 a.a.). (B and C) Subcellular localization of ASK3 mutants in HEK293A cells. Hyperosmotic stress: 600 mOsm, 10 min, DIC: differential interference contrast, white bar: 20  $\mu$ m. Note that the signal intensity of DIC cannot be compared among the images. (D) Requirement of CCC and CLCR for ASK3 inactivation in HEK293A cells. Hyperosmolality (–): 300 mOsm; (+): 500 mOsm; 10 min. IB: immunoblotting. †Nonspecific bands. (E) Relationship between ANKRD52 and ASK3 condensates in HEK293A cells. Magenta: ASK3-tdTomato, green: ANKRD52-Venus, hyperosmotic stress: 500 mOsm, white bar: 20  $\mu$ m.

947  
948  
949  
950  
951  
952  
953  
954  
955  
956  
957  
958  
959  
960



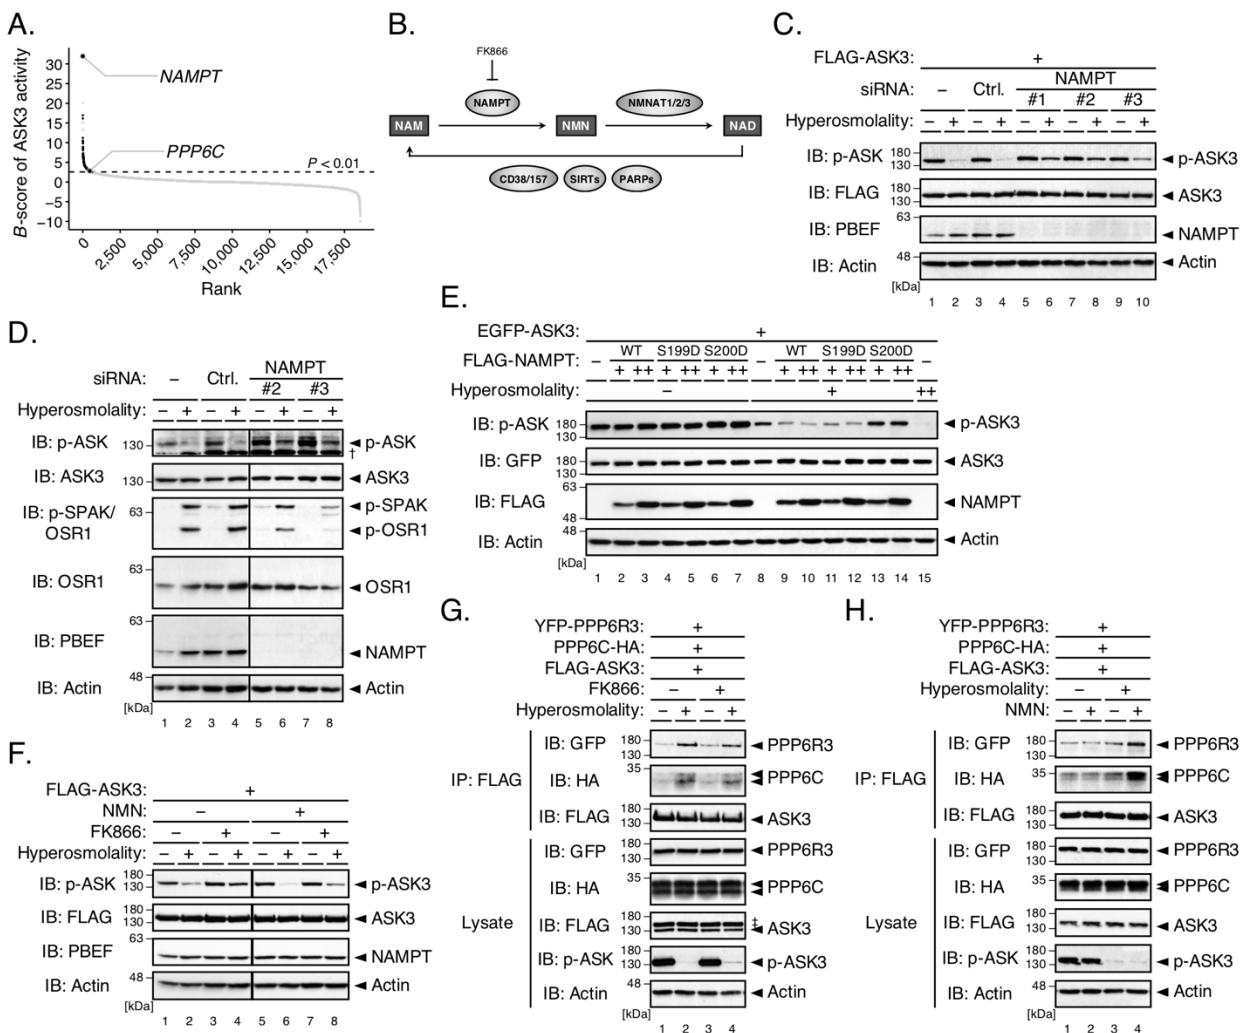

**Fig. 3. The NAD salvage pathway negatively regulates ASK3 activity under**

**hyperosmotic stress. (A)** Distribution of gene candidates to regulate ASK3 inactivation

in the previous primary screen (17). A sample with a higher B-score corresponds to a higher potential candidate. PPP6C: the catalytic subunit of PP6, an ASK3 phosphatase.

(B) Diagram of the NAD salvage pathway. Rectangles, arrows and circles indicate NAD-related molecules, reactions and enzymes, respectively. NAM: nicotinamide, NMN:

nicotinamide mononucleotide. (C) Effects of NAMPT depletion on ASK3 activity under hyperosmotic stress in FLAG-ASK3-stably expressing HEK293A (FLAG-ASK3-HEK293A) cells. (D) Effects of NAMPT depletion on endogenous ASK3 and

SPAK/OSR1 activities under hyperosmotic stress in HEK293A cells. †Nonspecific bands. (E) Effects of NAMPT overexpression on ASK3 activity under hyperosmotic stress in HEK293A cells. WT: wild-type, S199D: homodimer-insufficient mutant,

S200D: homodimer-null mutant. (F) Effects of FK866/NMN pretreatment on ASK3 activity under hyperosmotic stress in FLAG-ASK3-HEK293A cells. FK866: 10 nM; NMN: 1 mM; 3-hr pretreatment. (G and H) Effects of FK866/NMN pretreatment on the

interaction between ASK3 and PP6 under hyperosmotic stress in HEK293A cells. FK866: 10 nM; NMN: 1 mM; 24-hr pretreatment. ‡ Remnant bands from prior detection of GFP. (C–H) Hyperosmolality (–): 300 mOsm; (+): 425 mOsm (with the exception of

961  
962  
963  
964  
965  
966  
967  
968  
969  
970  
971  
972  
973  
974  
975  
976  
977  
978  
979

980 (G and H), 500 mOsm); (++) : 500 mOsm; 10 min, IB: immunoblotting, IP:  
981 immunoprecipitation. Note that superfluous lanes were digitally eliminated from blot  
982 images in (D and F) as indicated by black lines.  
983

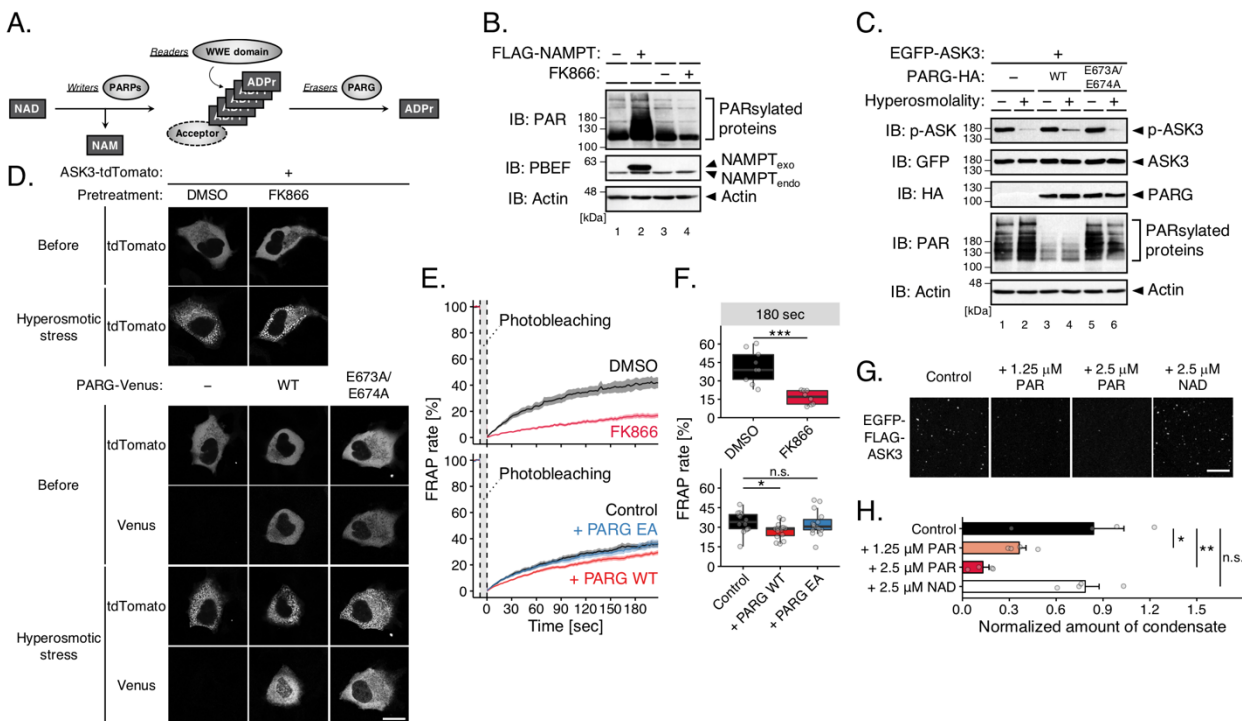

**Fig. 4. Poly(ADP-ribose) lubricates ASK3 condensates for ASK3 inactivation.** (A) Diagram of the PARylation dynamics. Rectangles, arrows and circles indicate NAD-related molecules, reactions and enzymes, respectively. ADPr: ADP-ribose. (B) Effects of NAMPT overexpression/inhibition on the amount of PAR in HEK293A cells. FK866: 10 nM, 18–24-hr pretreatment. NAMPT<sub>exo</sub>: exogenously expressed NAMPT, NAMPT<sub>endo</sub>: endogenously expressed NAMPT. (C) Effects of PARG overexpression on ASK3 activity under hyperosmotic stress in HEK293A cells. WT: wild-type, E673A/E674A: glycohydrolase-inactive mutant. Hyperosmolality (–): 300 mOsm; (+): 425 mOsm; 10 min. IB: immunoblotting. (D) Effects of PAR depletion on ASK3 condensates in ASK3-tdTomato-transfected HEK293A cells. Hyperosmotic stress: 600 mOsm, 10 min, white bar: 20  $\mu$ m. (E and F) Effects of PAR depletion on the FRAP of ASK3 condensates in ASK3-tdTomato-transfected HEK293A cells. Prior to the assay, cells were exposed to hyperosmotic stress (600 mOsm, 30 min). Data in (E): mean  $\pm$  SEM. Top panels:  $n = 8–9$  cells (pooled from 3 independent experiments), bottom panels:  $n = 14–15$  cells (pooled from 5 independent experiments). \* $P < 0.05$ , \*\*\* $P < 0.001$ , n.s. (not significant) by Brunner–Munzel’s tests (with the Bonferroni correction in the bottom). (D–F) DMSO: negative control for FK866, FK866: 10 nM, 18–24-hr pretreatment, Control: empty vector transfection, PARG WT: wild-type PARG-Venus transfection, PARG EA: E673A/E674A mutant PARG-Venus transfection. (G and H) Effects of PAR on solid-like ASK3 condensation in vitro. Control: 150 mM NaCl, 20 mM Tris (pH 7.5), 1 mM DTT, 20% PEG, 15-min incubation on ice. White bar: 10  $\mu$ m. Data: mean  $\pm$  SEM,  $n = 4$ . \* $P < 0.05$ , \*\* $P < 0.01$ , n.s. (not significant) according to Dunnett’s test.

984  
985  
986  
987  
988  
989  
990  
991  
992  
993  
994  
995  
996  
997  
998  
999  
1000  
1001  
1002  
1003  
1004  
1005  
1006  
1007  
1008
